# Supplementary material for: Dietary Advanced Glycation Endproducts Induce an Inflammatory Response in Human Macrophages in Vitro
Source: PubMed Central journal article supplement (PMC6315629; doi:10.3390/nu10121868), 2018-12-02
Supplement: nutrients-10-01868-s001.pdf [file nutrients-10-01868-s001.pdf]

**Table S1.** Target compounds and selected instrumental parameters for quantification of each compound by UPLC-(ESI+)MS/MS.

| <b>Compound</b> | <b>Precursor &gt; product ion (m/z)</b> | <b>Cone voltage (V)</b> | <b>Collision energy (eV)</b> | <b>Internal Standard used</b> |
|-----------------|-----------------------------------------|-------------------------|------------------------------|-------------------------------|
| CML             | <u>205.2 &gt; 84.2</u>                  | 20                      | 20                           | CML-d2                        |
|                 | <i>205.2 &gt; 130.2</i>                 | 20                      | 12                           |                               |
| CEL             | <u>219.2 &gt; 84.2</u>                  | 20                      | 20                           | CEL-d4                        |
|                 | <i>219.2 &gt; 130.2</i>                 | 20                      | 10                           |                               |
| MG-H1           | <u>229.2 &gt; 114.1</u>                 | 20                      | 13                           | MG-H1-d3                      |
|                 | <i>229.2 &gt; 166.2</i>                 | 20                      | 13                           |                               |
| Pentosidine     | <u>379.4 &gt; 135.1</u>                 | 20                      | 40                           | MG-H1-d3                      |
|                 | <i>379.4 &gt; 187.1</i>                 | 20                      | 35                           |                               |

Note: the underlined precursor > product ion transition was used for quantification, the *italic* precursor > product ion transition was used for confirmation.

**Table S2.** Instrumental detection and quantitation limits (pg on column) and method detection and quantitation limits (pg on column)

| <b>Compound</b> | <b>IDL (pg on column)</b> | <b>IQL (pg on column)</b> | <b>MDL (µg/ml)</b> | <b>MLQ (µg/ml)</b> |
|-----------------|---------------------------|---------------------------|--------------------|--------------------|
| CML             | 0.5                       | 1.5                       | 0.001              | 0.003              |
| CEL             | 1.0                       | 3.5                       | 0.01               | 0.03               |
| MG-H1           | 1.7                       | 5.7                       | 0.03               | 0.1                |
| Pentosidine     | 6.4                       | 21                        | 1.2                | 4                  |
